# Supplementary material for: Impact of Season on Intestinal Bacterial Communities and Pathogenic Diversity in Two Captive Duck Species
Source: MDPI journal article supplement (doi:10.3390/ani13243879), 2023-12-16
Supplement: s1 [file s1]

**Table S1.** The identified potentially pathogenic bacteria carried by captive Baikal teal and common teal in this study.

| Pathogenic Species                     | Phylum             | Reported Host       | Symptoms                                                                                          |
|----------------------------------------|--------------------|---------------------|---------------------------------------------------------------------------------------------------|
| 1. <i>Empedobacter falsenii</i>        | Bacteroidetes      | Human               | Pyelonephritis, liver cirrhosis, bacteremia <sup>72-73</sup>                                      |
| 2. <i>Sphingomonas koreensis</i>       | Proteobacteria     | Human               | Meningitis patient, peritonitis <sup>77-78</sup>                                                  |
| 3. <i>Dietzia maris</i>                | Actinobacteria     | Avian, fish, human  | Bacteremia, septic shock, prosthetic hip infection in immunocompromised patients <sup>79-81</sup> |
| 4. <i>Campylobacter canadensis</i>     | Epsilonbacteraeota | Whooping crane      | Diarrhea <sup>83</sup>                                                                            |
| 5. <i>Arsenicicoccus dermatophilus</i> | Actinobacteria     | Flamingo            | Pododermatitis <sup>93</sup>                                                                      |
| 6. <i>Empedobacter brevis</i>          | Bacteroidetes      | Human               | Malaise, nausea, vomiting <sup>94</sup>                                                           |
| 7. <i>Flavobacterium ceti</i>          | Bacteroidetes      | Beaked whale, human | Spontaneous bacterial peritonitis <sup>95-96</sup>                                                |
| 8. <i>Lactococcus garvieae</i>         | Firmicutes         | Fish                | Hyperacute and haemorrhagic septicemia <sup>97</sup>                                              |
| 9. <i>Paracoccus yeei</i>              | Proteobacteria     | Human               | Peritonitis <sup>98</sup>                                                                         |
| 10. <i>Mucispirillum schaedleri</i>    | Deferribacteres    | Human, mice         | Inflammation <sup>99</sup>                                                                        |

Table S2: Relative abundance of the dominant gut bacterial phyla in different groups.

| Phylum             | SMB   | SMC   | ATB   | ATC   | WTB   | WTC   | SPB   | SPC   | Total        |
|--------------------|-------|-------|-------|-------|-------|-------|-------|-------|--------------|
| Actinobacteria     | 4.74  | 6.17  | 2.57  | 3.50  | 1.56  | 3.57  | 0.63  | 0.20  | <b>2.94</b>  |
| Bacteroidetes      | 21.39 | 10.82 | 25.84 | 35.18 | 8.74  | 15.19 | 14.43 | 11.99 | <b>18.34</b> |
| Cyanobacteria      | 0.10  | 0.84  | 1.10  | 0.78  | 1.83  | 4.69  | 2.15  | 1.39  | <b>1.48</b>  |
| Epsilonbacteraeota | 0.02  | 0.00  | 0.01  | 0.00  | 0.02  | 0.01  | 0.12  | 0.81  | <b>0.11</b>  |
| Firmicutes         | 18.63 | 36.38 | 28.53 | 21.92 | 26.99 | 42.66 | 46.80 | 64.14 | <b>34.44</b> |
| Fusobacteria       | 0.00  | 0.00  | 0.00  | 0.00  | 0.04  | 0.03  | 4.26  | 0.19  | <b>0.55</b>  |
| Proteobacteria     | 55.05 | 45.57 | 40.40 | 38.03 | 58.26 | 31.80 | 31.46 | 21.11 | <b>41.24</b> |
| Verrucomicrobia    | 0.01  | 0.01  | 1.19  | 0.01  | 2.16  | 1.39  | 0.05  | 0.11  | <b>0.61</b>  |

**Table S3.** Relative abundance of the dominant gut bacterial genera in different groups.

| <b>Genus</b>                       | <b>SMB</b> | <b>SMC</b> | <b>ATB</b> | <b>ATC</b> | <b>WTB</b> | <b>WTC</b> | <b>SPB</b> | <b>SPC</b> | <b>Total</b> |
|------------------------------------|------------|------------|------------|------------|------------|------------|------------|------------|--------------|
| <i>Escherichia-Shigella</i>        | 41.50      | 24.50      | 22.51      | 8.99       | 11.98      | 0.13       | 4.21       | 4.03       | <b>16.28</b> |
| <i>Psychrobacter</i>               | 0.05       | 0.06       | 5.41       | 10.54      | 31.85      | 15.68      | 13.64      | 4.04       | <b>9.29</b>  |
| <i>Sphingobacterium</i>            | 12.68      | 7.25       | 13.03      | 19.39      | 1.62       | 4.66       | 2.12       | 0.28       | <b>8.19</b>  |
| <i>Acinetobacter</i>               | 2.36       | 1.60       | 11.35      | 16.24      | 8.36       | 0.48       | 8.88       | 13.28      | <b>7.42</b>  |
| <i>Lactobacillus</i>               | 1.90       | 1.19       | 2.12       | 8.48       | 0.19       | 0.21       | 3.14       | 6.93       | <b>5.88</b>  |
| <i>Chryseobacterium</i>            | 0.31       | 0.21       | 10.77      | 15.20      | 0.64       | 0.91       | 13.45      | 7.43       | <b>5.80</b>  |
| <i>Enterococcus</i>                | 1.48       | 5.20       | 5.54       | 0.59       | 4.38       | 3.63       | 6.23       | 11.36      | <b>4.22</b>  |
| <i>Comamonas</i>                   | 4.76       | 10.68      | 1.06       | 1.73       | 0.05       | 0.05       | 3.94       | 0.62       | <b>2.86</b>  |
| <i>Lysinibacillus</i>              | 1.90       | 1.19       | 2.12       | 8.48       | 0.19       | 0.21       | 3.14       | 6.93       | <b>2.73</b>  |
| <i>Flavobacterium</i>              | 5.67       | 2.75       | 2.76       | 1.99       | 0.18       | 3.67       | 1.52       | 2.72       | <b>2.62</b>  |
| <i>Ralstonia</i>                   | 0.00       | 0.00       | 0.00       | 0.00       | 7.89       | 10.52      | 0.33       | 3.33       | <b>2.25</b>  |
| <i>Clostridium sensu stricto 1</i> | 0.41       | 0.46       | 0.61       | 0.36       | 1.33       | 0.13       | 8.36       | 9.84       | <b>2.05</b>  |
| <i>Bacteroides</i>                 | 0.21       | 0.16       | 0.23       | 0.00       | 5.11       | 5.06       | 1.65       | 6.51       | <b>1.87</b>  |
| <i>Exiguobacterium</i>             | 0.08       | 0.10       | 2.66       | 3.33       | 1.49       | 1.08       | 2.06       | 1.51       | <b>1.48</b>  |
| <i>Sporosarcina</i>                | 2.39       | 8.08       | 0.10       | 0.00       | 0.48       | 0.00       | 0.00       | 0.00       | <b>1.42</b>  |
| <i>Empedobacter</i>                | 5.72       | 1.79       | 1.05       | 0.12       | 0.00       | 0.00       | 0.00       | 0.00       | <b>1.27</b>  |
| <i>Chryseomicrobium</i>            | 0.00       | 0.01       | 5.94       | 1.48       | 0.00       | 0.00       | 0.00       | 0.00       | <b>1.15</b>  |
| <i>Paenibacillus</i>               | 2.26       | 0.41       | 0.65       | 2.33       | 0.95       | 0.18       | 0.79       | 1.74       | <b>1.14</b>  |
| <i>Gottschalkia</i>                | 0.05       | 0.07       | 4.25       | 0.07       | 0.61       | 0.22       | 1.44       | 1.47       | <b>1.07</b>  |

**Table S4.** NMDS and ANOSIM test of difference groups.

| <b>Group</b>      | <b>Stress</b> | <b>ANOSIM: R</b> | <b>ANOSIM: P value</b> |
|-------------------|---------------|------------------|------------------------|
| <b>SMB vs SMC</b> | 0.0586        | 0.120            | 0.1582                 |
| <b>ATB vs ATC</b> | 0.0477        | 0.157            | 0.1603                 |
| <b>WTB vs WTC</b> | 0.2756        | 0.009            | 0.1681                 |
| <b>SPB vs SPC</b> | 0.1411        | 0.020            | 0.1663                 |
| <b>SMB vs ATB</b> | 0.1551        | 0.4875           | 0.001                  |
| <b>SMB vs WTB</b> | 0.1427        | 0.7013           | 0.001                  |
| <b>SMB vs SPB</b> | 0.0815        | 0.9297           | 0.001                  |
| <b>ATB vs WTB</b> | 0.1427        | 0.7013           | 0.001                  |
| <b>ATB vs SPB</b> | 0.1131        | 0.8592           | 0.001                  |
| <b>WTB vs SPB</b> | 0.1684        | 0.3028           | 0.001                  |
| <b>SMC vs ATC</b> | 0.1096        | 0.5532           | 0.001                  |
| <b>SMC vs WTC</b> | 0.0831        | 0.7306           | 0.001                  |
| <b>SMC vs SPC</b> | 0.0963        | 0.7287           | 0.001                  |
| <b>ATC vs WTC</b> | 0.0827        | 0.9566           | 0.001                  |
| <b>ATC vs SPC</b> | 0.1014        | 0.6900           | 0.001                  |
| <b>WTC vs SPC</b> | 0.1488        | 0.6265           | 0.001                  |

**Table S5. Co-occurrence network topological features statistics.**

|                                       | <b>SMB</b> | <b>SMC</b> | <b>ATB</b> | <b>ATC</b> | <b>WTB</b> | <b>WTC</b> | <b>SPB</b> | <b>SPC</b> |
|---------------------------------------|------------|------------|------------|------------|------------|------------|------------|------------|
| <b>Nodes</b>                          | 829        | 945        | 925        | 525        | 1,061      | 1,252      | 952        | 961        |
| <b>Edges</b>                          | 31,944     | 40,447     | 41,290     | 15,842     | 70,271     | 72,826     | 41,618     | 58,906     |
| <b>Density</b>                        | 0.093      | 0.091      | 0.097      | 0.115      | 0.125      | 0.093      | 0.092      | 0.128      |
| <b>Diameter</b>                       | 5          | 5          | 5          | 6          | 5          | 5          | 5          | 6          |
| <b>Modularity</b>                     | 1.360      | 1.351      | 1.248      | 1.027      | 0.917      | 1.784      | 1.645      | 1.028      |
| <b>Average degree</b>                 | 77.066     | 85.602     | 89.276     | 60.350     | 132.462    | 116.335    | 87.433     | 122.593    |
| <b>Average weighted</b>               | 55.349     | 56.948     | 70.592     | 54.044     | 144.117    | 52.291     | 49.908     | 107.209    |
| <b>Average clustering coefficient</b> | 0.806      | 0.781      | 0.825      | 0.833      | 0.856      | 0.766      | 0.779      | 0.833      |
| <b>Average Path length</b>            | 2.633      | 2.575      | 2.666      | 2.750      | 2.448      | 2.594      | 2.561      | 2.523      |
| <b>Number of community</b>            | 16         | 18         | 15         | 29         | 15         | 12         | 16         | 15         |

**Table S6.** Classification information of keystone taxa in gut bacterial co-occurrence network.

| Groups | OTU     | Zi             | Pi     | Phylum         | Genus                           | Species                            |
|--------|---------|----------------|--------|----------------|---------------------------------|------------------------------------|
| SMB    | OTU960  | -5.740         | 0.813  | Actinobacteria | <i>Nocardioiides</i>            | Unclassified                       |
|        | OTU744  | -2.374         | 0.760  | Firmicutes     | <i>Staphylococcus</i>           | Unclassified                       |
|        | OTU902  | -2.883         | 0.724  | Proteobacteria | <i>Pseudomonas</i>              | Unclassified                       |
|        | OTU684  | -2.337         | 0.715  | Firmicutes     | <i>Peptococcus</i>              | Unclassified                       |
|        | OTU664  | -2.883         | 0.704  | Chloroflexi    | Unclassified                    | Unclassified                       |
|        | OTU230  | -4.297         | 0.704  | Firmicutes     | <i>Macrococcus</i>              | Unclassified                       |
|        | OTU558  | -1.935         | 0.697  | Bacteroidetes  | <i>Sphingobacterium</i>         | Unclassified                       |
|        | OTU87   | -2.345         | 0.672  | Firmicutes     | <i>Gottschalkia</i>             | Unclassified                       |
|        | OTU552  | -4.728         | 0.671  | Bacteroidetes  | <i>Sphingobacterium</i>         | Unclassified                       |
|        | OTU1162 | -2.745         | 0.653  | Proteobacteria | <i>Pseudomonas</i>              | Unclassified                       |
| SMC    | OTU93   | 3.876          | 0.1439 | Proteobacteria | Unclassified                    | Unclassified                       |
|        | OTU32   | -2.941         | 0.797  | Firmicutes     | <i>Trichococcus</i>             | Unclassified                       |
|        | OTU133  | -2.998         | 0.750  | Proteobacteria | <i>Devosia</i>                  | Unclassified                       |
|        | OTU684  | -2.769         | 0.729  | Firmicutes     | <i>Peptococcus</i>              | Unclassified                       |
|        | OTU3213 | -2.884         | 0.714  | Proteobacteria | <i>Paracoccus</i>               | Unclassified                       |
|        | OTU41   | -2.176         | 0.710  | Firmicutes     | <i>Psychrobacillus</i>          | Unclassified                       |
|        | OTU87   | -2.197         | 0.689  | Firmicutes     | <i>Gottschalkia</i>             | Unclassified                       |
|        | OTU1105 | -2.076         | 0.676  | Firmicutes     | <i>Lachnoclostridium</i>        | Unclassified                       |
|        | OTU53   | -2.176         | 0.669  | Firmicutes     | <i>Psychrobacillus</i>          | Unclassified                       |
|        | OTU707  | -2.609         | 0.648  | Bacteroidetes  | <i>Flavobacterium</i>           | <i>Flavobacterium</i> sp.          |
| ATB    | OTU180  | -2.142         | 0.646  | Firmicutes     | <i>Paenibacillus</i>            | <i>Paenibacillus xylanilyticus</i> |
|        |         |                |        |                | <i>Allorhizobium-</i>           |                                    |
|        | OTU1130 | -2.826         | 0.643  | Proteobacteria | <i>Neorhizobium-</i>            | Unclassified                       |
|        |         |                |        |                | <i>Pararhizobium-Rhizobium</i>  |                                    |
|        | OTU2202 | -2.747         | 0.640  | Bacteroidetes  | <i>Chryseobacterium</i>         | Unclassified                       |
|        | OTU596  | -7.158         | 0.633  | Proteobacteria | Unclassified                    | Unclassified                       |
|        | OTU1090 | -1.482         | 0.626  | Firmicutes     | Unclassified                    | Unclassified                       |
|        | OTU280  | -2.922         | 0.704  | Firmicutes     | <i>Paenibacillus</i>            | Unclassified                       |
|        | OTU848  | -2.820         | 0.689  | Firmicutes     | <i>Lactobacillus</i>            | Unclassified                       |
|        | OTU156  | -3.073         | 0.689  | Bacteroidetes  | <i>Parasegetibacter</i>         | Unclassified                       |
|        | OTU155  | -2.922         | 0.679  | Chloroflexi    | <i>Paraburkholderia tropica</i> | <i>Paraburkholderia tropica</i>    |
| Groups | OTU     | Zi             | Pi     | Phylum         | Genus                           | Species                            |
|        | OTU558  | 3.647          | 0.0453 | Bacteroidetes  | <i>Sphingobacterium</i>         | Unclassified                       |
|        | OTU560  | 3.770          | 0.0228 | Firmicutes     | <i>Lysinibacillus</i>           | Unclassified                       |
|        | OTU566  | 3.770          | 0.0228 | Proteobacteria | <i>Stenotrophomonas</i>         | <i>Stenotrophomonas koreensis</i>  |
|        | OTU569  | 3.893          | 0.0226 | Bacteroidetes  | <i>Flavobacterium</i>           | Unclassified                       |
|        | OTU1813 | 4.076562<br>29 | 0.0222 | Bacteroidetes  | <i>Chryseobacterium</i>         | Unclassified                       |
|        | OTU732  | 4.077          | 0.0222 | Proteobacteria | <i>Noviherbaspirillum</i>       | Unclassified                       |
|        | OTU797  | 4.077          | 0.0222 | Bacteroidetes  | <i>Pedobacter</i>               | Unclassified                       |
|        | OTU571  | 4.138          | 0.0221 | Bacteroidetes  | <i>Sphingobacterium</i>         | <i>Sphingobacterium</i> sp.        |
|        | OTU559  | 4.199          | 0.0219 | Proteobacteria | <i>Brevundimonas</i>            | Unclassified                       |
| ATC    | OTU1773 | -1.818         | 0.688  | Bacteroidetes  | <i>Chryseobacterium</i>         | Unclassified                       |
|        | OTU106  | -1.861         | 0.633  | Actinobacteria | <i>Oerskovia</i>                | Unclassified                       |

|     |         |        |       |                    |                                    |                               |
|-----|---------|--------|-------|--------------------|------------------------------------|-------------------------------|
| WTB | OTU284  | -1.825 | 0.813 | Firmicutes         | <i>Erysipelotrichaceae</i> UCG-003 | Unclassified                  |
|     | OTU412  | -3.515 | 0.796 | Firmicutes         | <i>Peptococcus</i>                 | Unclassified                  |
|     | OTU1449 | -3.302 | 0.734 | Verrucomicrobia    | <i>Akkermansia</i>                 | Unclassified                  |
|     | OTU126  | -3.159 | 0.728 | Proteobacteria     | <i>Massilia</i>                    | Unclassified                  |
|     | OTU1414 | -2.475 | 0.687 | Actinobacteria     | <i>Curtobacterium</i>              | Unclassified                  |
|     | OTU2746 | -1.760 | 0.655 | Proteobacteria     | <i>Pseudomonas</i>                 | Unclassified                  |
|     | OTU27   | -1.804 | 0.653 | Proteobacteria     | <i>Comamonas</i>                   | Unclassified                  |
| WTC | OTU56   | -2.442 | 0.645 | Proteobacteria     | <i>Porphyrobacter</i>              | Unclassified                  |
|     | OTU23   | -2.802 | 0.778 | Firmicutes         | <i>Enterococcus</i>                | Unclassified                  |
|     | OTU2325 | -2.698 | 0.690 | Cyanobacteria      | Unclassified                       | Unclassified                  |
|     | OTU34   | -2.592 | 0.679 | Firmicutes         | <i>Lactobacillus</i>               | <i>Lactobacillus aviarius</i> |
|     | OTU1276 | -2.592 | 0.670 | Firmicutes         | <i>Parvoimonas</i>                 | Unclassified                  |
|     | OTU1955 | -2.910 | 0.670 | Epsilonbacteraeota | <i>Arcobacter</i>                  | Unclassified                  |
|     | OTU31   | -2.521 | 0.652 | Firmicutes         | <i>Lactobacillus</i>               | <i>Lactobacillus aviarius</i> |
|     | OTU69   | -2.345 | 0.646 | Proteobacteria     | <i>Sphingobium</i>                 | Unclassified                  |
|     | OTU360  | -2.707 | 0.639 | Firmicutes         | <i>Enterococcus</i>                | <i>Enterococcus columbae</i>  |
|     | OTU247  | -2.381 | 0.638 | Proteobacteria     | Unclassified                       | Unclassified                  |
|     | OTU106  | -2.744 | 0.628 | Actinobacteria     | <i>Oerskovia</i>                   | Unclassified                  |
|     |         |        |       |                    |                                    | Unclassified                  |
|     | OTU626  | -2.662 | 0.624 | Firmicutes         | Unclassified                       |                               |

| Groups | OTU     | Zi     | Pi    | Phylum         | Genus                             | Species                         |
|--------|---------|--------|-------|----------------|-----------------------------------|---------------------------------|
| SPB    | OTU862  | 3.228  | 0.077 | Actinobacteria | Varibaculum                       | Unclassified                    |
|        | OTU155  | 3.160  | 0.106 | Chloroflexi    | <i>Paraburkholderia</i>           | <i>Paraburkholderia tropica</i> |
|        | OTU205  | 3.160  | 0.106 | Proteobacteria | <i>Methyloparacoccus</i>          | Unclassified                    |
|        | OTU40   | -4.569 | 0.801 | Firmicutes     | <i>Paenibacillus</i>              | Unclassified                    |
|        | OTU187  | -2.304 | 0.778 | Bacteroidetes  | <i>Dyadobacter</i>                | Unclassified                    |
|        |         |        |       |                | <i>Chroococcidiopsis</i> PCC 7203 | Unclassified                    |
|        | OTU538  | -2.712 | 0.760 | Cyanobacteria  |                                   |                                 |
|        | OTU67   | -3.178 | 0.754 | Proteobacteria | <i>Ralstonia</i>                  | Unclassified                    |
|        | OTU75   | -2.429 | 0.733 | Proteobacteria | <i>Escherichia-Shigella</i>       | Unclassified                    |
|        | OTU181  | -2.382 | 0.717 | Bacteroidetes  | <i>Parabacteroides</i>            | Unclassified                    |
|        | OTU366  | -2.241 | 0.716 | Proteobacteria | <i>Pseudomonas</i>                | Unclassified                    |
|        | OTU495  | -2.523 | 0.704 | Bacteroidetes  | <i>Prevotellaceae</i> Ga6A1 group | Unclassified                    |
|        | OTU277  | -2.178 | 0.689 | Firmicutes     | <i>Subdoligranulum</i>            | Unclassified                    |
|        | OTU2381 | -1.831 | 0.684 | Proteobacteria | <i>Duganella</i>                  | Unclassified                    |
|        | OTU412  | -2.272 | 0.679 | Firmicutes     | <i>Peptococcus</i>                | Unclassified                    |
|        | OTU1648 | -2.240 | 0.671 | Firmicutes     | <i>Gottschalkia</i>               | Unclassified                    |
|        | OTU64   | -2.272 | 0.668 | Proteobacteria | <i>Ralstonia</i>                  | Unclassified                    |
| SPC    | OTU962  | -1.989 | 0.661 | Firmicutes     | Unclassified                      | Unclassified                    |
|        | OTU217  | -2.571 | 0.633 | Cyanobacteria  | Unclassified                      | Unclassified                    |
|        | OTU411  | -1.713 | 0.730 | Proteobacteria | <i>Massilia</i>                   | Unclassified                    |
|        | OTU684  | -1.713 | 0.728 | Firmicutes     | <i>Peptococcus</i>                | Unclassified                    |
|        | OTU2661 | -1.713 | 0.686 | Proteobacteria | <i>FukuN57</i>                    | Unclassified                    |
|        |         |        |       |                | <i>Ruminococcaceae</i> UCG-014    | Unclassified                    |
|        | OTU3027 | -1.735 | 0.680 | Firmicutes     |                                   |                                 |
|        | OTU2459 | -1.735 | 0.672 | Firmicutes     | <i>Blautia</i>                    | bacterium ic1272                |
|        | OTU1517 | -2.016 | 0.640 | Firmicutes     | Unclassified                      | Unclassified                    |

|         |        |       |                |                                                                                 |              |
|---------|--------|-------|----------------|---------------------------------------------------------------------------------|--------------|
| OTU297  | -1.649 | 0.636 | Proteobacteria | <i>Allorhizobium-</i><br><i>Neorhizobium-</i><br><i>Pararhizobium-Rhizobium</i> | Unclassified |
| OTU2189 | -1.454 | 0.631 | Proteobacteria | <i>Bradyrhizobium</i>                                                           | Unclassified |

---

**Table S7.** The intestinal bacterial and potentially pathogenic sequences across the samples.

| Sample ID | Sequences |          | Pathogen/Bacteria (%) |
|-----------|-----------|----------|-----------------------|
|           | Bacteria  | Pathogen |                       |
| SMB1      | 32,968.00 | 821      | 2.49                  |
| SMB2      | 32,373.00 | 1259     | 3.89                  |
| SMB3      | 32,042.00 | 1526     | 4.76                  |
| SMB4      | 55,459.00 | 75       | 0.14                  |
| SMB5      | 47,630.00 | 1703     | 3.58                  |
| SMB6      | 40,289.00 | 138      | 0.34                  |
| SMB7      | 36,193.00 | 1333     | 3.68                  |
| SMB8      | 39,080.00 | 21       | 0.05                  |
| SMB9      | 35,555.00 | 3521     | 9.90                  |
| SMB10     | 55,249.00 | 28       | 0.05                  |
| SMB11     | 42,649.00 | 19       | 0.04                  |
| SMB12     | 36,144.00 | 138      | 0.38                  |
| SMC1      | 35,053.00 | 35       | 0.10                  |
| SMC2      | 28,615.00 | 30       | 0.10                  |
| SMC3      | 51,637.00 | 34       | 0.07                  |
| SMC4      | 45,631.00 | 137      | 0.30                  |
| SMC5      | 29,241.00 | 348      | 1.19                  |
| SMC6      | 38,612.00 | 1069     | 2.77                  |
| SMC7      | 45,568.00 | 300      | 0.66                  |
| SMC8      | 28,974.00 | 437      | 1.51                  |
| SMC9      | 42,384.00 | 522      | 1.23                  |
| SMC10     | 47,678.00 | 759      | 1.59                  |
| SMC11     | 47,285.00 | 339      | 0.72                  |
| SMC12     | 31,962.00 | 276      | 0.86                  |
| ATB1      | 40,702.00 | 50       | 0.12                  |
| ATB2      | 14,955.00 | 27       | 0.18                  |
| ATB3      | 21,121.00 | 32       | 0.15                  |
| ATB4      | 17,014.00 | 53       | 0.31                  |
| ATB5      | 20,525.00 | 42       | 0.20                  |
| ATB6      | 12,850.00 | 147      | 1.14                  |
| ATB7      | 18,655.00 | 39       | 0.21                  |
| ATB8      | 27,297.00 | 51       | 0.19                  |
| ATB9      | 20,762.00 | 12       | 0.06                  |
| ATB10     | 17,865.00 | 0        | 0.00                  |
| ATB11     | 19,801.00 | 2        | 0.01                  |
| ATB12     | 22,781.00 | 30       | 0.13                  |

| Sample ID | Sequences |          | Pathogen/Bacteria (%) |
|-----------|-----------|----------|-----------------------|
|           | Bacteria  | Pathogen |                       |
| ATC1      | 17,446.00 | 4        | 0.02                  |
| ATC2      | 18,078.00 | 0        | 0.00                  |
| ATC3      | 27,494.00 | 2        | 0.01                  |
| ATC4      | 22,735.00 | 4        | 0.02                  |
| ATC5      | 17,936.00 | 2        | 0.01                  |
| ATC6      | 18,781.00 | 2        | 0.01                  |
| ATC7      | 20,931.00 | 3        | 0.01                  |
| ATC8      | 13,769.00 | 22       | 0.16                  |
| ATC9      | 22,317.00 | 86       | 0.39                  |
| ATC10     | 15,234.00 | 0        | 0.00                  |
| ATC11     | 20,430.00 | 9        | 0.04                  |
| ATC12     | 14,712.00 | 8        | 0.05                  |
| WTB1      | 41,301.00 | 0        | 0.00                  |
| WTB2      | 30,533.00 | 2        | 0.01                  |
| WTB3      | 57,421.00 | 1        | 0.00                  |
| WTB4      | 29,319.00 | 0        | 0.00                  |
| WTB5      | 50,024.00 | 6        | 0.01                  |
| WTB6      | 54,528.00 | 0        | 0.00                  |
| WTB7      | 45,980.00 | 0        | 0.00                  |
| WTB8      | 26,398.00 | 9        | 0.03                  |
| WTB9      | 38,712.00 | 5        | 0.01                  |
| WTB10     | 16,101.00 | 0        | 0.00                  |
| WTB11     | 47,295.00 | 0        | 0.00                  |
| WTB12     | 38,809.00 | 2        | 0.01                  |
| WTC1      | 44,822.00 | 2        | 0.00                  |
| WTC2      | 52,193.00 | 28       | 0.05                  |
| WTC3      | 53,108.00 | 0        | 0.00                  |
| WTC4      | 37,336.00 | 8        | 0.02                  |
| WTC5      | 24,502.00 | 1        | 0.00                  |
| WTC6      | 45,874.00 | 5        | 0.01                  |
| WTC7      | 40,057.00 | 0        | 0.00                  |
| WTC8      | 58,421.00 | 0        | 0.00                  |
| WTC9      | 33,103.00 | 3        | 0.01                  |
| WTC10     | 55,085.00 | 4        | 0.01                  |
| WTC11     | 39,439.00 | 5        | 0.01                  |
| WTC12     | 46,355.00 | 0        | 0.00                  |

| Sample ID | Sequences |          | Pathogen/Bacteria (%) |
|-----------|-----------|----------|-----------------------|
|           | Bacteria  | Pathogen |                       |
| SPB1      | 35,722.00 | 20       | 0.06                  |
| SPB2      | 53,840.00 | 0        | 0.00                  |
| SPB3      | 30,262.00 | 2        | 0.01                  |
| SPB4      | 19,281.00 | 20       | 0.10                  |
| SPB5      | 30,608.00 | 17       | 0.06                  |
| SPB6      | 32,659.00 | 0        | 0.00                  |
| SPB7      | 47,027.00 | 2        | 0.00                  |
| SPB8      | 59,335.00 | 3        | 0.01                  |
| SPB9      | 39,525.00 | 1        | 0.00                  |
| SPB10     | 50,575.00 | 0        | 0.00                  |
| SPB11     | 49,452.00 | 1        | 0.00                  |
| SPB12     | 27,484.00 | 3        | 0.01                  |
| SPC1      | 51,267.00 | 39       | 0.08                  |
| SPC2      | 36,617.00 | 4        | 0.01                  |
| SPC3      | 43,456.00 | 0        | 0.00                  |
| SPC4      | 45,010.00 | 5        | 0.01                  |
| SPC5      | 37,223.00 | 1        | 0.00                  |
| SPC6      | 30,820.00 | 0        | 0.00                  |
| SPC7      | 37,578.00 | 48       | 0.13                  |
| SPC8      | 63,959.00 | 2        | 0.00                  |
| SPC9      | 49,965.00 | 1        | 0.00                  |
| SPC10     | 31,577.00 | 0        | 0.00                  |
| SPC11     | 27,781.00 | 0        | 0.00                  |
| SPC12     | 23,473.00 | 8        | 0.03                  |

**Table S8.** The difference in the relative abundance of potentially pathogenic bacteria observed among different groups.

| Pathogenic species                  | SMB                              | SMC                             | ATB                             | ATC                             | WTB                             | WTC                             | SPB                              | SPC                             |
|-------------------------------------|----------------------------------|---------------------------------|---------------------------------|---------------------------------|---------------------------------|---------------------------------|----------------------------------|---------------------------------|
| <i>Empedobacter falsenii</i>        | 5.7630<br>(7.8323) <sup>b</sup>  | 1.5091<br>(1.4692) <sup>a</sup> | 0.2617<br>(0.3012) <sup>a</sup> | 0.0658<br>(0.1720) <sup>a</sup> | 0.0000<br>(0.0000) <sup>a</sup> | 0.0000<br>(0.0000) <sup>a</sup> | 0.0000<br>(0.0000) <sup>a</sup>  | 0.0000<br>(0.0000) <sup>a</sup> |
| <i>Arsenicicoccus dermatophilus</i> | 0.0000<br>(0.0000) <sup>a</sup>  | 0.0013<br>(0.0030) <sup>b</sup> | 0.0000<br>(0.0000) <sup>a</sup>  | 0.0000<br>(0.0000) <sup>a</sup> |
| <i>Campylobacter canadensis</i>     | 0.0052<br>(0.0117) <sup>a</sup>  | 0.0020<br>(0.0049) <sup>a</sup> | 0.0000<br>(0.0000) <sup>a</sup> | 0.0013<br>(0.0045) <sup>a</sup> | 0.0104<br>(0.0201) <sup>a</sup> | 0.0098<br>(0.0111) <sup>a</sup> | 0.0313<br>(0.0000) <sup>ab</sup> | 0.0690<br>(0.1288) <sup>b</sup> |
| <i>Dietzia maris</i>                | 0.0020<br>(0.0049) <sup>a</sup>  | 0.0117<br>(0.0312) <sup>a</sup> | 0.0332<br>(0.0622) <sup>a</sup> | 0.0221<br>(0.0406) <sup>a</sup> | 0.0046<br>(0.0188) <sup>a</sup> | 0.0260<br>(0.0596) <sup>a</sup> | 0.0026<br>(0.0069) <sup>a</sup>  | 0.0000<br>(0.000) <sup>a</sup>  |
| <i>Empedobacter brevis</i>          | 0.0033<br>(0.0113) <sup>a</sup>  | 0.0000<br>(0.0000) <sup>a</sup> | 0.0000<br>(0.0000) <sup>a</sup> | 0.0000<br>(0.0000) <sup>a</sup> | 0.0000<br>(0.0000) <sup>a</sup> | 0.0000<br>(0.0000) <sup>a</sup> | 0.0000<br>(0.0000) <sup>a</sup>  | 0.0000<br>(0.0000) <sup>a</sup> |
| <i>Flavobacterium ceti</i>          | 0.4154<br>(0.8257) <sup>b</sup>  | 0.0391<br>(0.1165) <sup>a</sup> | 0.0000<br>(0.0000) <sup>a</sup>  | 0.0000<br>(0.0000) <sup>a</sup> |
| <i>Lactococcus garvieae</i>         | 0.0013<br>(0.0045) <sup>a</sup>  | 0.0007<br>(0.0023) <sup>a</sup> | 0.0000<br>(0.0000) <sup>a</sup> | 0.0000<br>(0.0000) <sup>a</sup> | 0.0000<br>(0.0000) <sup>a</sup> | 0.0007<br>(0.0023) <sup>a</sup> | 0.0000<br>(0.0000) <sup>a</sup>  | 0.0000<br>(0.0000) <sup>a</sup> |
| <i>Stenotrophomonas koreensis</i>   | 0.6973<br>(1.0577) <sup>ab</sup> | 1.2240<br>(2.1499) <sup>b</sup> | 0.0202<br>(0.0289) <sup>a</sup> | 0.0026<br>(0.0090) <sup>a</sup> | 0.0000<br>(0.0000) <sup>a</sup> | 0.0000<br>(0.0000) <sup>a</sup> | 0.0104<br>(0.0361) <sup>a</sup>  | 0.0007<br>(0.0023) <sup>a</sup> |
| <i>Paracoccus yeei</i>              | 0.0000<br>(0.0000) <sup>a</sup>  | 0.0026<br>(0.0051) <sup>b</sup> | 0.0007<br>(0.0023) <sup>a</sup> | 0.0007<br>(0.0023) <sup>a</sup> | 0.0000<br>(0.0000) <sup>a</sup> | 0.0000<br>(0.0000) <sup>a</sup> | 0.0000<br>(0.0000) <sup>a</sup>  | 0.0000<br>(0.0000) <sup>a</sup> |
| <i>Mucispirillum schaedleri</i>     | 0.0020<br>(0.0049) <sup>a</sup>  | 0.0000<br>(0.0000) <sup>a</sup> | 0.0000<br>(0.0000) <sup>a</sup> | 0.0000<br>(0.0000) <sup>a</sup> | 0.0013<br>(0.0045) <sup>a</sup> | 0.0000<br>(0.0000) <sup>a</sup> | 0.0007<br>(0.0023) <sup>a</sup>  | 0.0007<br>(0.0023) <sup>a</sup> |

The values in brackets represent the standard deviation. Letters following brackets represent significant differences from the one-way ANOVA and Duncan test ( $p < 0.05$ ). SMB (summer Baikal teal), SMC (summer common teal), ATB (autumn Baikal teal), ATC (autumn common teal), WTB (winter Baikal teal), WTC (winter common teal), SPB (spring Baikal teal), and SPC (spring common teal).

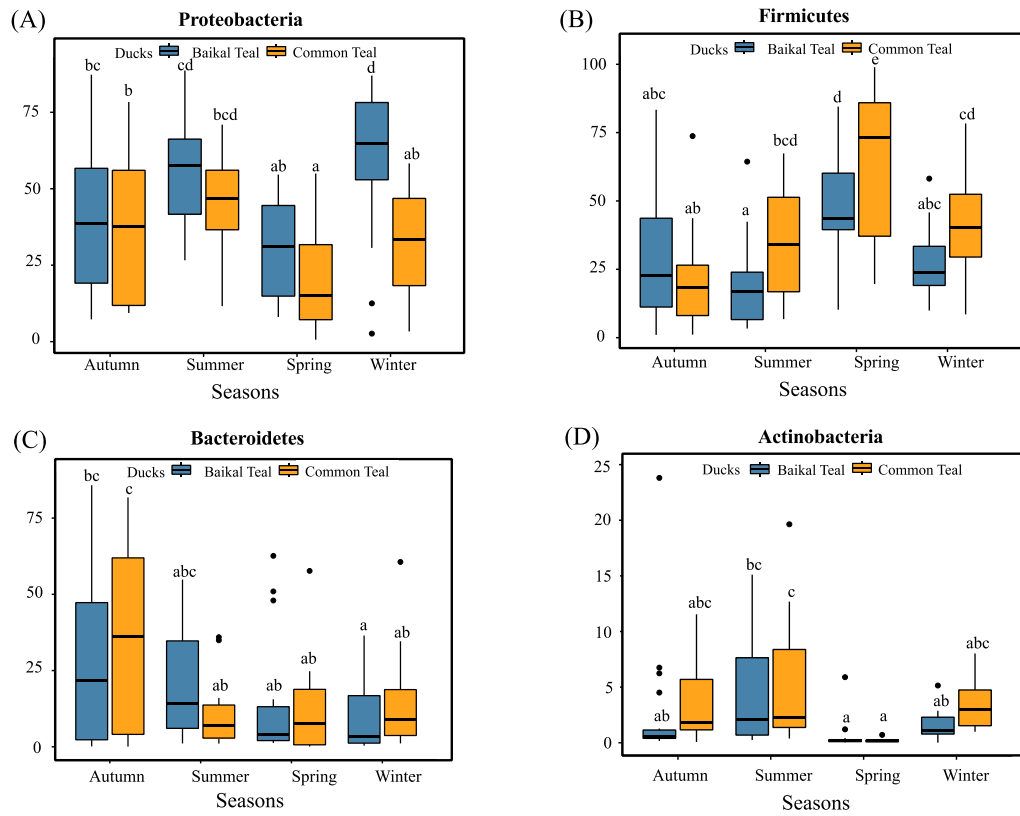

**Figure S1.** One-way ANOVA with Duncan's post-hoc test showed significant differences in relative abundance across groups at the phyla level. Small letters were used to indicate significant differences at  $p < 0.05$ . The whiskers extended from the box to the minimum and maximum values and the black dots showed the extreme values.

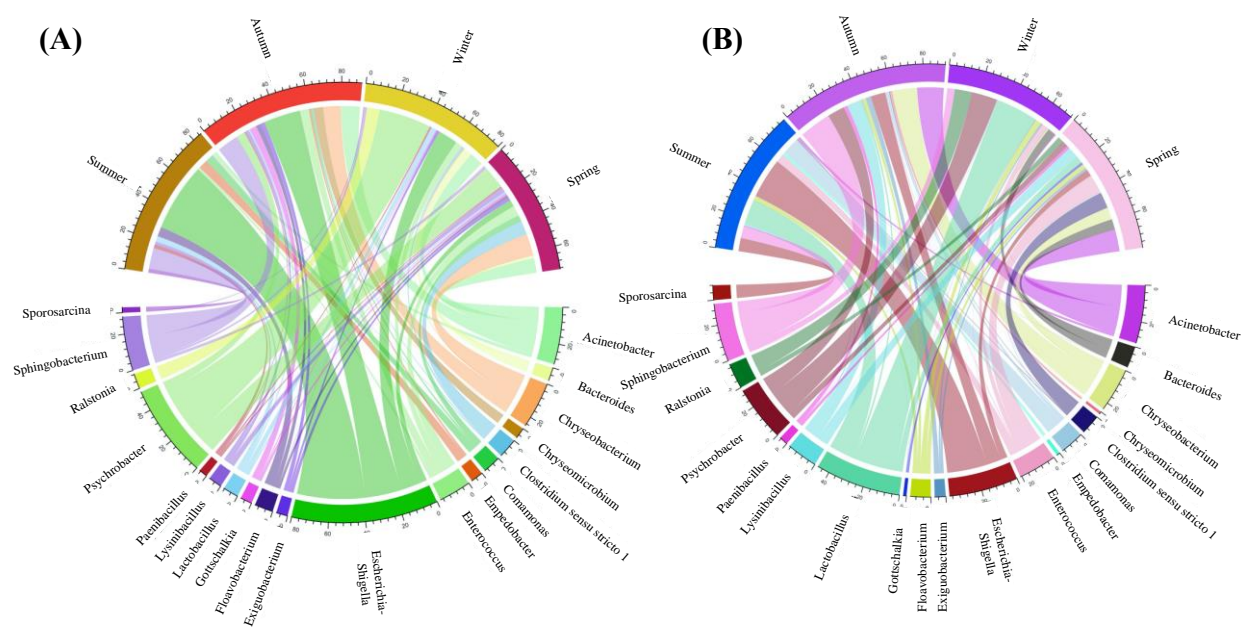

**Figure S2.** The chord diagram illustrates the proportionate distributions of the dominant bacterial genera in two captive ducks during four seasons. (A) Dominant genera in Baikal teal and (B) dominant genera in common teal.
